# Supplementary material for: Non-target analysis and characterisation of nanoparticles in spirits via single particle ICP-TOF-MS
Source: Royal Society of Chemistry journal article supplement (doi:10.1039/d3ja00253e), 2023-01-01
Supplement: d3ja00253e2.pdf [file d3ja00253e2.pdf]

## Supplementary Information

# Non-target analysis and characterisation of nanoparticles in spirits via single particle ICP-ToF-MS

**Raquel Gonzalez de Vega<sup>1</sup>, Thomas E. Lockwood<sup>2</sup>, Lhiam Paton<sup>1</sup>, Lukas Schlatt<sup>3</sup>, David Clases<sup>\*1</sup>**

<sup>1</sup> Institute of Chemistry, University of Graz, Graz, Austria

<sup>2</sup> Hyphenated Mass Spectrometry Laboratory, University of Technology Sydney, NSW, Australia

<sup>3</sup> Nu Instruments, Wrexham, United Kingdom

\*Corresponding author email: [David.Clases@uni-graz.at](mailto:David.Clases@uni-graz.at)

## Table of contents

**Figure S1.** The ratio of <sup>54</sup>Fe and <sup>56</sup>Fe was investigated in all detected NPs (top). The ratio was found to be drifting at high <sup>56</sup>Fe intensities due to a limited dynamic range. The <sup>54</sup>Fe/<sup>57</sup>Fe plot (bottom) shows isotope ratios independent from signal intensities. <sup>56</sup>Fe was used to count particles, <sup>54</sup>Fe was used to determine sizes and masses.

**Table S1.** Overview of NP characteristics in all samples

## Python script:

[https://github.com/djdt/djdt.github.io/blob/feece3a08b1ff90131bbd9d618ba778509941467/scripts/non\\_target\\_screening\\_script.py](https://github.com/djdt/djdt.github.io/blob/feece3a08b1ff90131bbd9d618ba778509941467/scripts/non_target_screening_script.py) (updated 28.09.2023)

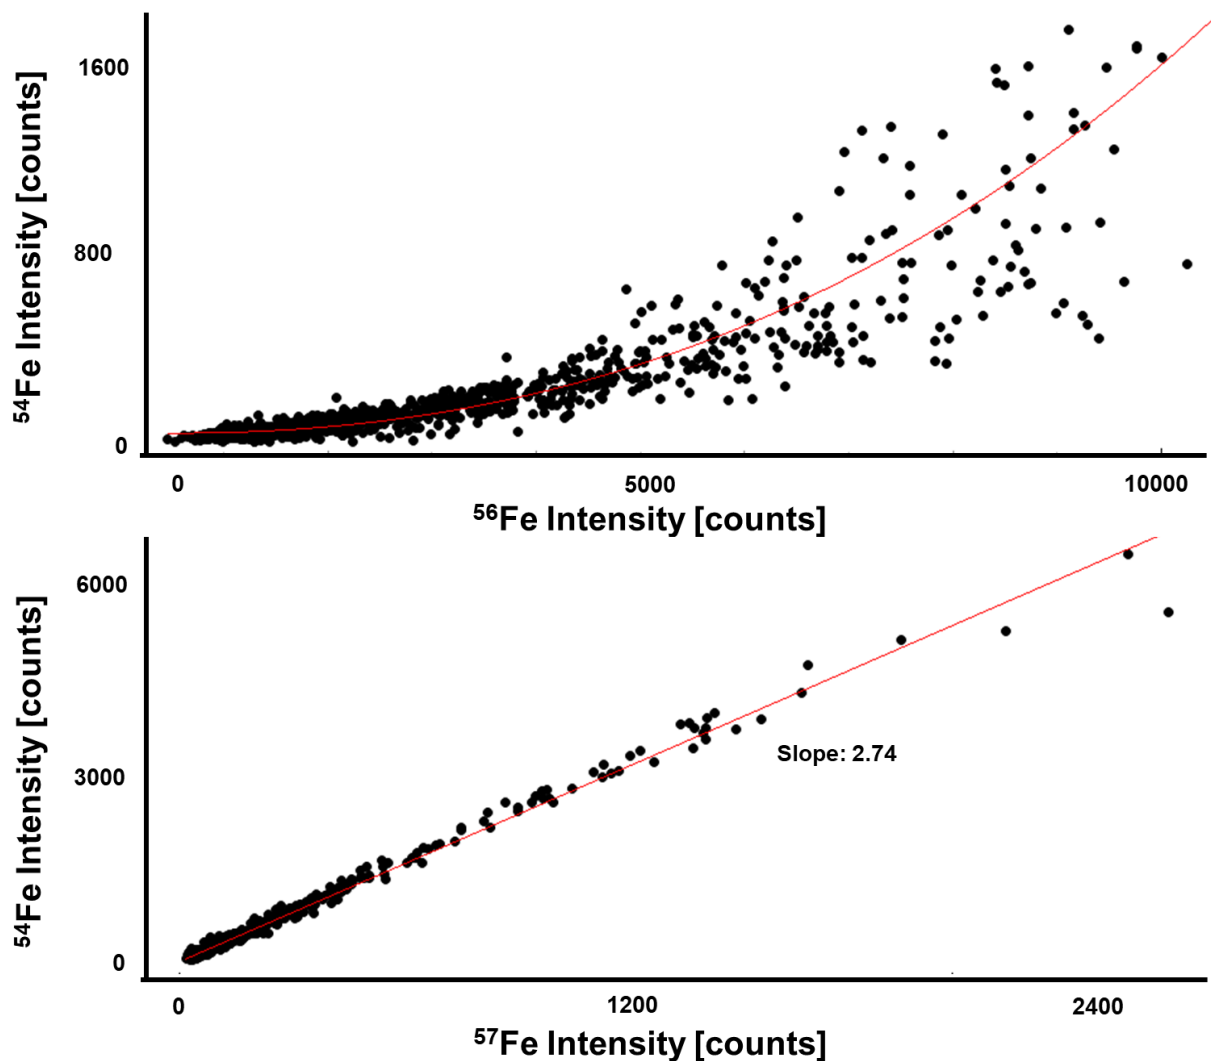

Figure S1. The ratio of  $^{54}\text{Fe}$  and  $^{56}\text{Fe}$  was investigated in all detected NPs (top). The ratio was found to be drifting at high  $^{56}\text{Fe}$  intensities due to a limited dynamic range. The  $^{54}\text{Fe}/^{57}\text{Fe}$  plot (bottom) shows isotope ratios independent from signal intensities.  $^{56}\text{Fe}$  was used to count particles,  $^{54}\text{Fe}$  was used to determine sizes and masses.

Table S1. Overview of NP characteristics in all samples.

| Sample NP entities      | PNC ( $\times 10^3$ ) | Ionic Bkg (ng/L)   | Mean mass (fg)   | Mean size (nm)  | sDL (nm) |
|-------------------------|-----------------------|--------------------|------------------|-----------------|----------|
| <b>Tap water</b>        |                       |                    |                  |                 |          |
| $\text{Fe}_2\text{O}_3$ | $14.2 \pm 1.1$        | $77.1 \pm 20.0$    | $0.95 \pm 1.90$  | $58.6 \pm 25.0$ | 31.9     |
| CuO                     | $42.6 \pm 1.9$        | $268 \pm 160$      | $1.43 \pm 2.60$  | $64.5 \pm 24.0$ | 28.3     |
| ZnO                     | $91.0 \pm 1.1$        | $940 \pm 1100$     | $4.20 \pm 4.70$  | $100 \pm 36$    | 36.4     |
| <b>W1</b>               |                       |                    |                  |                 |          |
| $\text{TiO}_2$          | $4.19 \pm 0.59$       | $3140 \pm 5100$    | $4.13 \pm 7.90$  | $94.6 \pm 53.0$ | 50       |
| $\text{Fe}_2\text{O}_3$ | $38.0 \pm 1.8$        | $57600 \pm 460000$ | $4.82 \pm 6.90$  | $113 \pm 28$    | 87       |
| Ag                      | $9.21 \pm 0.85$       | $14.2 \pm 2.6$     | $0.208 \pm 0.30$ | $30.9 \pm 8.5$  | 17       |
| Au                      | $6.14 \pm 0.69$       | $0.53 \pm 0.02$    | $0.31 \pm 0.41$  | $28.1 \pm 9.6$  | 13       |

|                                |             |                   |             |             |    |
|--------------------------------|-------------|-------------------|-------------|-------------|----|
| <b>W2</b>                      |             |                   |             |             |    |
| TiO <sub>2</sub>               | 6.43 ± 0.72 | 201 ± 83          | 5.93 ± 9.90 | 105 ± 63    | 38 |
| Fe <sub>2</sub> O <sub>3</sub> | 12.4 ± 1.0  | 10300 ± 36000     | 5.13 ± 9.00 | 108 ± 40    | 59 |
| Ag                             | 8.46 ± 0.83 | 34.3 ± 9.4        | 0.35 ± 1.10 | 34.2 ± 12.0 | 17 |
| SnO <sub>2</sub>               | 39.5 ± 1.8  | 200 ± 56          | 3.45 ± 4.20 | 89.0 ± 29.0 | 39 |
| Au                             | 7.35 ± 0.78 | 0.63 ± 0.02       | 0.37 ± 0.59 | 29.3 ± 11.0 | 14 |
| <b>W3</b>                      |             |                   |             |             |    |
| TiO <sub>2</sub>               | 18.8 ± 1.4  | 983 ± 880         | 9.1 ± 20.0  | 116 ± 74    | 43 |
| MnO                            | 8.64 ± 0.91 | 2210 ± 4900       | 1.28 ± 1.70 | 68.3 ± 24.0 | 40 |
| Fe <sub>2</sub> O <sub>3</sub> | 34.1 ± 1.8  | 42.1 ± 210        | 105 ± 110   | 300 ± 110   | 88 |
| Ag                             | 8.26 ± 0.80 | 8.50 ± 1.30       | 0.60 ± 1.00 | 41.4 ± 16.0 | 17 |
| SnO <sub>2</sub>               | 9.60 ± 0.88 | 93.8 ± 19.0       | 1.88 ± 2.60 | 71.4 ± 26.0 | 37 |
| Au                             | 4.40 ± 0.58 | 0.23 ± 0.02       | 0.77 ± 1.10 | 36.0 ± 15.0 | 13 |
| <b>W4</b>                      |             |                   |             |             |    |
| TiO <sub>2</sub>               | 3.80 ± 0.60 | 2530 ± 3600       | 1.76 ± 4.60 | 69.1 ± 39.0 | 48 |
| Fe <sub>2</sub> O <sub>3</sub> | 13.3 ± 1.0  | 46200 ± 320000    | 6.87 ± 5.62 | 114 ± 28    | 81 |
| Ag                             | 13.7 ± 1.0  | 14.9 ± 2.8        | 0.19 ± 0.21 | 30.3 ± 7.4  | 17 |
| Au                             | 12.5 ± 1.0  | 0.60 ± 0.02       | 0.36 ± 0.57 | 28.5 ± 12.0 | 14 |
| <b>W5</b>                      |             |                   |             |             |    |
| TiO <sub>2</sub>               | 2.20 ± 0.42 | 220 ± 96          | 7.25 ± 15.0 | 107 ± 69    | 38 |
| MnO                            | 0.77 ± 0.22 | 2210000 ± 6000000 | 121 ± 43    | 34.6 ± 3.7  | 33 |
| Fe <sub>2</sub> O <sub>3</sub> | 6.43 ± 0.72 | 5380 ± 13000      | 4.90 ± 11.0 | 97.9 ± 47.0 | 50 |
| Ag                             | 5.86 ± 0.67 | 43.1 ± 13.0       | 0.60 ± 0.74 | 43.3 ± 14.0 | 18 |
| Au                             | 4.86 ± 0.61 | 0.61 ± 0.02       | 0.54 ± 0.86 | 31.7 ± 14.0 | 13 |
| <b>W6</b>                      |             |                   |             |             |    |
| TiO <sub>2</sub>               | 4.46 ± 0.61 | 3180 ± 5300       | 2.84 ± 5.00 | 84.8 ± 46.0 | 50 |
| Fe <sub>2</sub> O <sub>3</sub> | 71.7 ± 2.4  | 58300 ± 470000    | 4.89 ± 7.00 | 105 ± 26    | 86 |
| Ag                             | 6.26 ± 0.71 | 14.4 ± 2.7        | 0.24 ± 0.42 | 31.4 ± 9.7  | 16 |
| Au                             | 6.25 ± 0.69 | 0.511 ± 0.02      | 0.47 ± 0.70 | 28.7 ± 14.0 | 13 |
| <b>W7</b>                      |             |                   |             |             |    |
| TiO <sub>2</sub>               | 5.94 ± 0.70 | 407 ± 240         | 6.95 ± 11.0 | 101 ± 54    | 40 |
| MnO                            | 1.08 ± 0.29 | 1310000 ± 2600000 | 0.12 ± 0.10 | 34.0 ± 6.4  | 31 |
| Fe <sub>2</sub> O <sub>3</sub> | 6.43 ± 0.72 | 17000 ± 76000     | 4.90 ± 8.6  | 104 ± 42    | 63 |
| Ag                             | 9.03 ± 0.84 | 33.2 ± 9.2        | 0.41 ± 0.65 | 37.0 ± 13.0 | 18 |
| Au                             | 7.79 ± 0.78 | 0.54 ± 0.02       | 0.50 ± 0.73 | 31.3 ± 13.0 | 14 |
| <b>V1</b>                      |             |                   |             |             |    |
| Fe <sub>2</sub> O <sub>3</sub> | 5.86 ± 0.69 | 805 ± 690         | 2.45 ± 6.60 | 77.8 ± 36.0 | 37 |
| SnO <sub>2</sub>               | 7.24 ± 0.77 | 162 ± 43          | 2.98 ± 2.70 | 86.7 ± 26.0 | 38 |
| <b>G1</b>                      |             |                   |             |             |    |
| Fe <sub>2</sub> O <sub>3</sub> | 4.88 ± 0.63 | 334 ± 190         | 2.71 ± 5.30 | 85.3 ± 37.0 | 35 |
| CuO                            | 4.71 ± 0.63 | 412 ± 300         | 0.56 ± 0.65 | 50.5 ± 15.0 | 29 |
| SnO <sub>2</sub>               | 2.62 ± 0.45 | 20.1 ± 1.9        | 8.17 ± 9.20 | 113 ± 48    | 34 |
| <b>L1</b>                      |             |                   |             |             |    |
| TiO <sub>2</sub>               | 32.8 ± 1.6  | 623 ± 460         | 6.53 ± 6.80 | 128 ± 46    | 42 |
| MnO                            | 1.08 ± 0.29 | 61400 ± 80000     | 77.6 ± 55.4 | 29.3 ± 4.8  | 28 |
| Fe <sub>2</sub> O <sub>3</sub> | 44.8 ± 1.9  | 5040 ± 1200       | 2.39 ± 3.02 | 87.8 ± 26.0 | 49 |
| Ag                             | 4.17 ± 0.57 | 21.9 ± 5.0        | 0.58 ± 0.56 | 44.4 ± 11.0 | 17 |
| SnO <sub>2</sub>               | 5.17 ± 0.66 | 1850 ± 1600       | 6.68 ± 9.70 | 109 ± 39    | 45 |
| Au                             | 2.78 ± 0.46 | 869 ± 35          | 0.33 ± 0.20 | 39.9 ± 7.3  | 13 |

---

**L2**

|                                |             |                   |              |            |    |
|--------------------------------|-------------|-------------------|--------------|------------|----|
| TiO <sub>2</sub>               | 4.78 ± 0.61 | 4330 ± 890        | 5.31 ± 7.30  | 115 ± 47   | 54 |
| MnO                            | 0.93 ± 0.27 | 1010000 ± 1800000 | 0.11 ± 0.84  | 32.4 ± 6.6 | 30 |
| Fe <sub>2</sub> O <sub>3</sub> | 1.85 ± 0.38 | 18500 ± 91000     | 7.08 ± 15.00 | 108 ± 55   | 65 |
| Ag                             | 2.31 ± 0.42 | 26600 ± 6700      | 0.34 ± 0.30  | 37.5 ± 8.6 | 17 |

---
